# Supplementary material for: Design of Protease-Responsive Antifungal Liposomal Formulation Decorated with a Lipid-Modified Chitin-Binding Domain
Source: MDPI journal article supplement (doi:10.3390/ijms25073567), 2024-03-22
Supplement: s1 [file s1]

## Supplementary Materials

### Table of contents

|       |                                                                            |    |
|-------|----------------------------------------------------------------------------|----|
| 1     | Supplementary information                                                  | S2 |
| 1-1.  | Amino acid sequence of LysM-Q                                              | S2 |
| 1-2.  | Amino acid sequence of LysM-muGFP-Q                                        | S2 |
| 1-3.  | Amino acid sequence of LysM-TD linker-Q                                    | S3 |
| 2     | Supplementary results                                                      | S3 |
| 2-1.  | Zeta potential LysM-Q and LysM-lipid                                       | S3 |
| 2-2.  | Stability of LysM-lipid-AmBisome for three days at 25°C                    | S3 |
| 2-3.  | CLSM Analysis of Rhod-Lipo with $\alpha$ -chitin                           | S4 |
| 2-4.  | Quantitative results of fluorescent intensity of LysM-lipid with Rhod-Lipo | S4 |
| 2-5.  | Qualitative results of antifungal activity test for lipid-K                | S5 |
| 2-6.  | Estimation of anchoring ratio of LysM-muGFP-lipid to AmBisome              | S5 |
| 2-7.  | Conjugation of Q-Tagged LysM with thrombin linker by MTG                   | S6 |
| 2-8.  | Zeta potential LysM-TD linker-Q and LysM-TD linker-lipid                   | S6 |
| 2-9.  | Qualitative results of intensity of thrombin                               | S7 |
| 2-10. | Evaluation of the cleavage of TD-linker by thrombin                        | S7 |

## 1. Supplementary information

### 1-1. Amino acid sequence of LysM-Q (pI/Mw: 6.99 / 8739.65)

MCTTYTIKSGDTCYAI SQARGISL SDFESWNAGIDC NNLQIGQVVCVSKPSTSTTPSPTPSSSSNGFYPLQ  
MRGGHHHHHH

### 1-2. Amino acid sequence of LysM-muGFP-Q (pI/Mw: 6.04 / 35078.23)

MCTTYTIKSGDTCYAI SQARGISL SDFESWNAGIDC NNLQIGQVVCVSKPSTSTTPSPTPSSSSNGHHHHHH  
SKGEELFTGVVPILVELDGDVNGHKFSVRGEGEGDATNGKLT LKFICTTGKLPVPWPTLVTTLT YGVLCFSR  
YPDHMKRHDFFKSAMPEGYVQERTISFKDDGTYKTRAEVKFEGDTLVNRIELKGIDFKEDGNILGHKLEYN  
NSHNVYITADKQKNGIKAYFKIRHNVEDGSGVQLADHYQQNTPIGDGPVLLPDNHYLSTQSVLSKDPNEKRDH  
MVLLEDVTAAGITHGMDELYRGGGGSLLQG

### 1-3. Amino acid sequence of LysM-TD linker-Q (pI/Mw: 6.04 / 35078.23)

MCTTYTIKSGDTCYAI SQARGISL SDFESWNAGIDC NNLQIGQVVCVSKPSTSTTPGSLVPRGSSPTPSSSS  
NGFYPLQMRGGHHHHHH

Brown: LysM2 domain

Blue: Linker sequences derived from PrChia

Purple: Microbial transglutaminase-reactive Gln-containing tag (FQ-tag)

Green: Hexahistidine tag

Dark Green: muGFP

Orange: Microbial transglutaminase-reactive Gln-containing tag (LQ-tag)

Pink: Thrombin linker

## 2. Supplementary results

### 2-1. Zeta potential LysM-Q or LysM-lipid

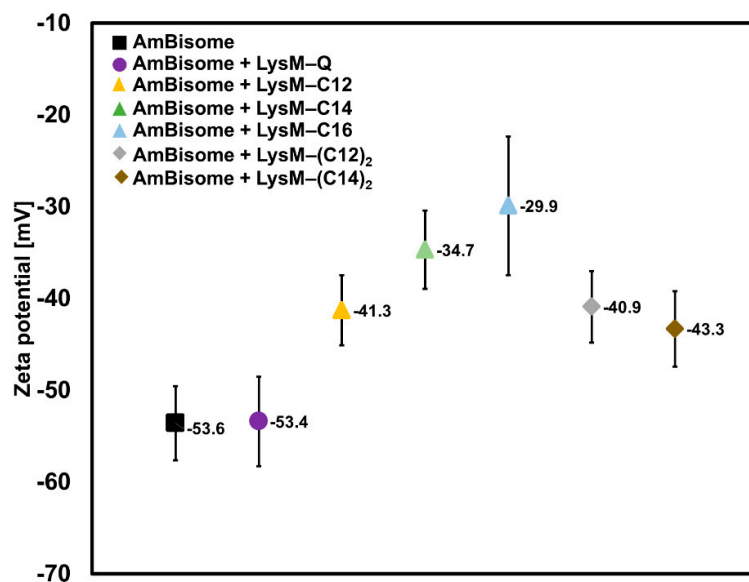

Figure S1.  $\zeta$ -potential of AmBisome with LysM-Q or LysM-lipid.

### 2-2. Stability of LysM-lipid-AmBisome for three days at 25°C

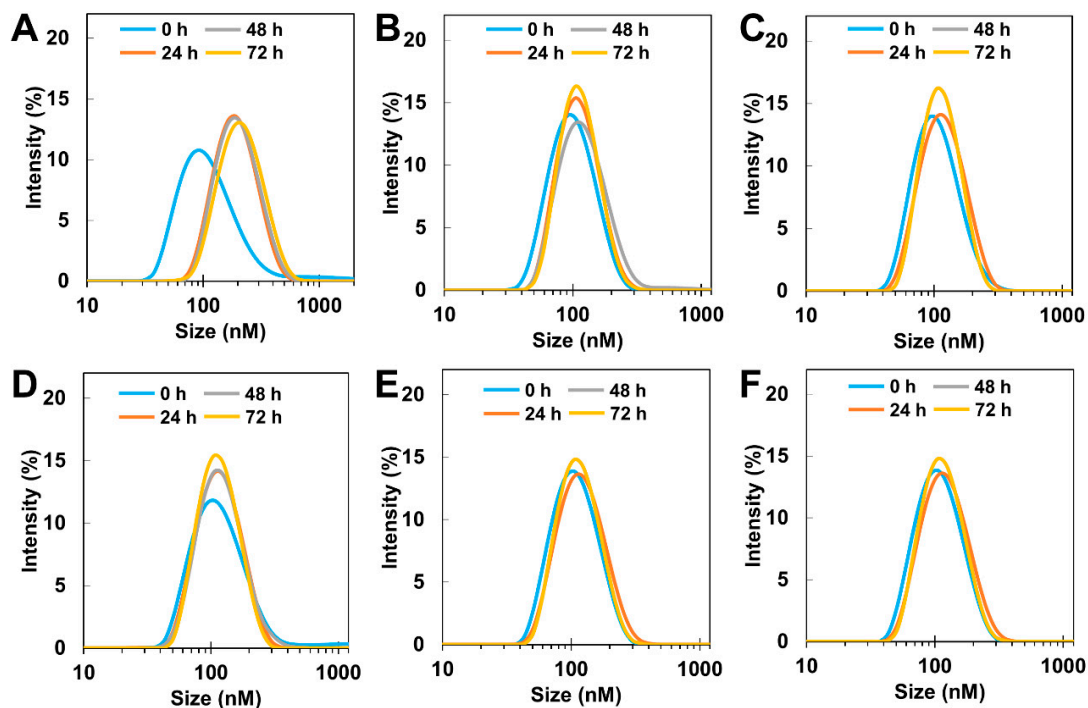

Figure S2. DLS measurements of AmBisome with (A) LysM-Q; (B) LysM-C12; (C) LysM-C14; (D) LysM-C16; (E) LysM-(C12)<sub>2</sub>; and (F) LysM-(C14)<sub>2</sub> during three days of incubation at 25 °C.

### 2-3. CLSM Analysis of Rhod-Lipo with $\alpha$ -chitin

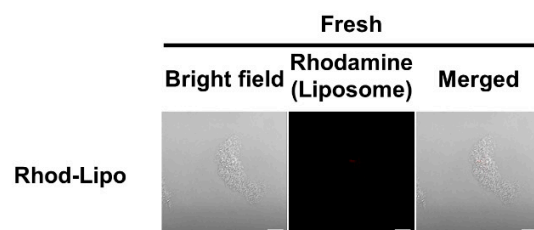

**Figure S3.** CLSM analysis of Rhod-Lipo (50  $\mu$ M) in the presence of 0.5%  $\alpha$ -chitin in 20 mM sodium phosphate buffer, pH 7.4, at 25  $^{\circ}$ C (bars: 20  $\mu$ m).

### 2-4. Quantitative results of fluorescent intensity of LysM-lipid with Rhod-Lipo

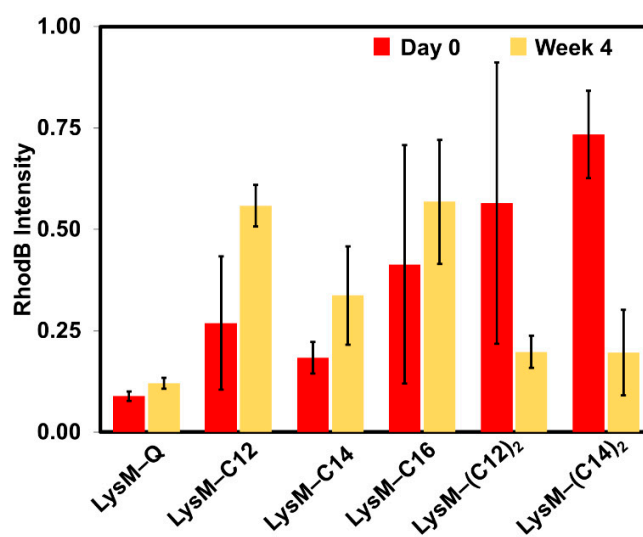

**Figure S4.** Results of intensity of LysM-lipid labeled with Rhod-Lipo.

## 2-5. Qualitative results of antifungal activity test for lipid-K

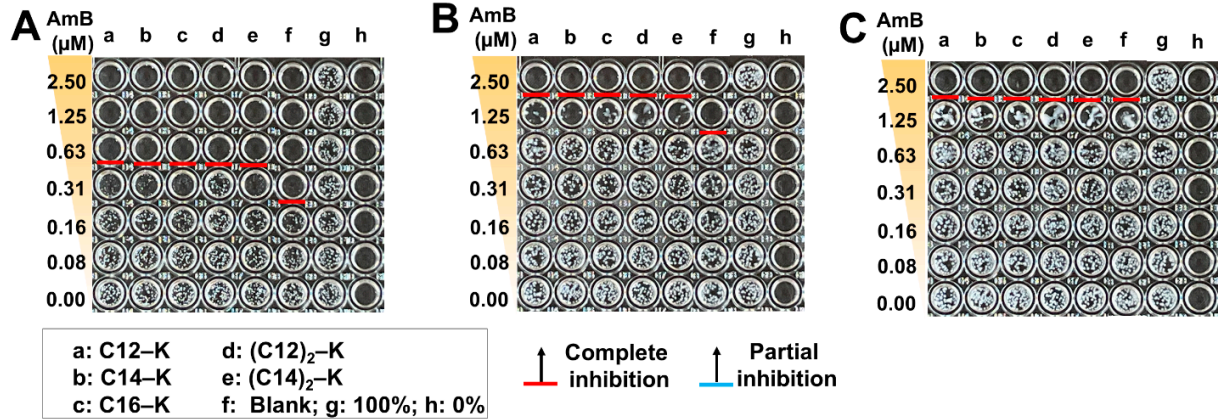

**Figure S5.** Representative image of a 96-well plate after culturing *C. albicans* in the presence of 0–2.5 μM of AMB with 1 μM of each sample at (A) 24 h, (B) 48 h and (C) 72 h in 20 mM NaPi, pH 7.4, humidity 90% at 35°C.

## 2-6. Estimation of anchoring ratio of LysM-muGFP-lipid to AmBisome

**Table S1.** Estimation of the number of LysM-muGFP-lipid or -(lipid)<sub>2</sub> on AmBisome

| Samples                       | Anchoring ratio of LysM-Lipid to AmBisome |                            |                 | Estimation of Number of LysM-lipid on AmBisome |
|-------------------------------|-------------------------------------------|----------------------------|-----------------|------------------------------------------------|
|                               | Total <sub>LysM-Lipid</sub>               | Anch <sub>LysM-Lipid</sub> | Anchoring ratio |                                                |
| LysM-muGFP-Q                  | 21.3                                      | 1.19                       | 0.0559          | 457 LysM-muGFP-Q/AmBisome                      |
| LysM-muGFP-C12                | 22.5                                      | 2.24                       | 0.0996          | 814 LysM-muGFP-C12/AmBisome                    |
| LysM-muGFP-C14                | 21.9                                      | 3.57                       | 0.163           | 1332 LysM-muGFP-C14/AmBisome                   |
| LysM-muGFP-C16                | 18.9                                      | 3.5                        | 0.1852          | 1514 LysM-muGFP-C16/AmBisome                   |
| LysM-muGFP-(C12) <sub>2</sub> | 21.9                                      | 6.58                       | 0.3005          | 2456 LysM-muGFP-(C12) <sub>2</sub> /AmBisome   |
| LysM-muGFP-(C14) <sub>2</sub> | 21.9                                      | 6.8                        | 0.3105          | 2538 LysM-muGFP-(C14) <sub>2</sub> /AmBisome   |

Footnote: Total<sub>LysM-lipid</sub>, the total amount of LysM-muGFP-lipid used in this experiment; Anch<sub>LysM-lipid</sub>, the amount of anchored LysM-muGFP-lipid.

## 2-7. Conjugation of Q-Tagged LysM with thrombin linker by MTG

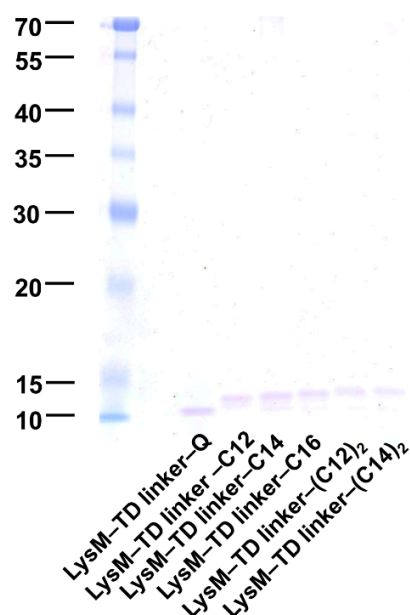

**Figure S6.** Bioconjugate of the Q-tagged LysMs. (SDS-PAGE analysis results of unmodified LysM-TD linker-Q and LysM-TD linker-Q modified with C12-K, C14-K, C16-K, (C12)<sub>2</sub>-K, and (C14)<sub>2</sub>-K by MTG. All conjugation reactions were carried out under conditions of 10  $\mu$ M LysM-TD linker-Q, 1% DDM, 10  $\mu$ M Lipid-K, and 0.1 U/mL MTG in 10 mM Tris-HCl (pH 8.0) at 37 °C for 1 h.

## 2-8. Zeta potential LysM-TD linker-Q or LysM-TD linker-lipid

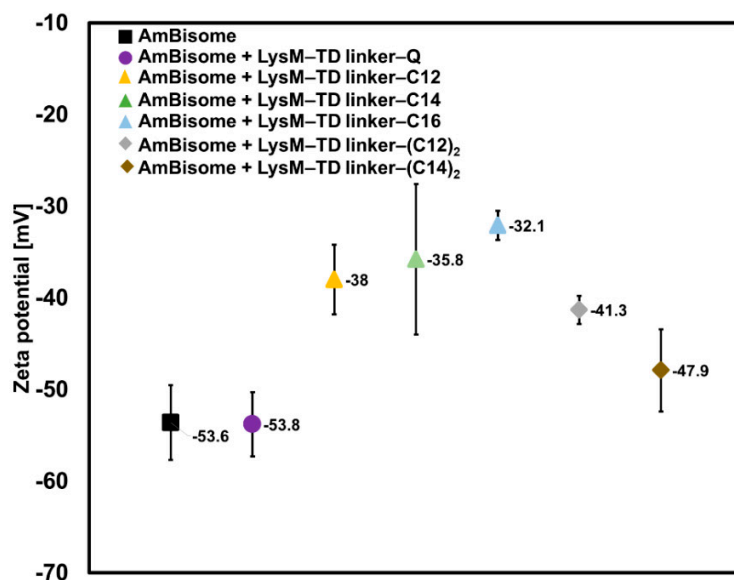

**Figure S7.**  $\zeta$ -potential of AmBisome with LysM-TD linker-Q or LysM-TD linker-lipid.

## 2-9. Qualitative results of antifungal activity test for thrombin

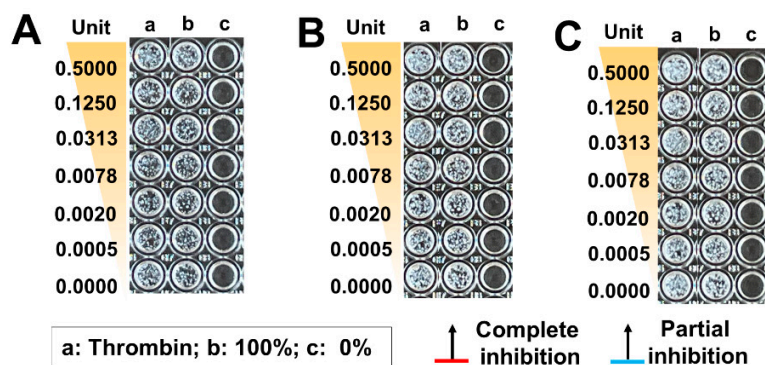

**Figure S8.** Representative image of a 96-well plate after culturing *C. albicans* in the presence of 0–0.5 Unit of thrombin at (A) 24 h, (B) 48 h and (C) 72 h in 20 mM NaPi, pH 7.4, humidity 90% at 35°C.

## 2-10. Evaluation of the cleavage of TD linker by thrombin

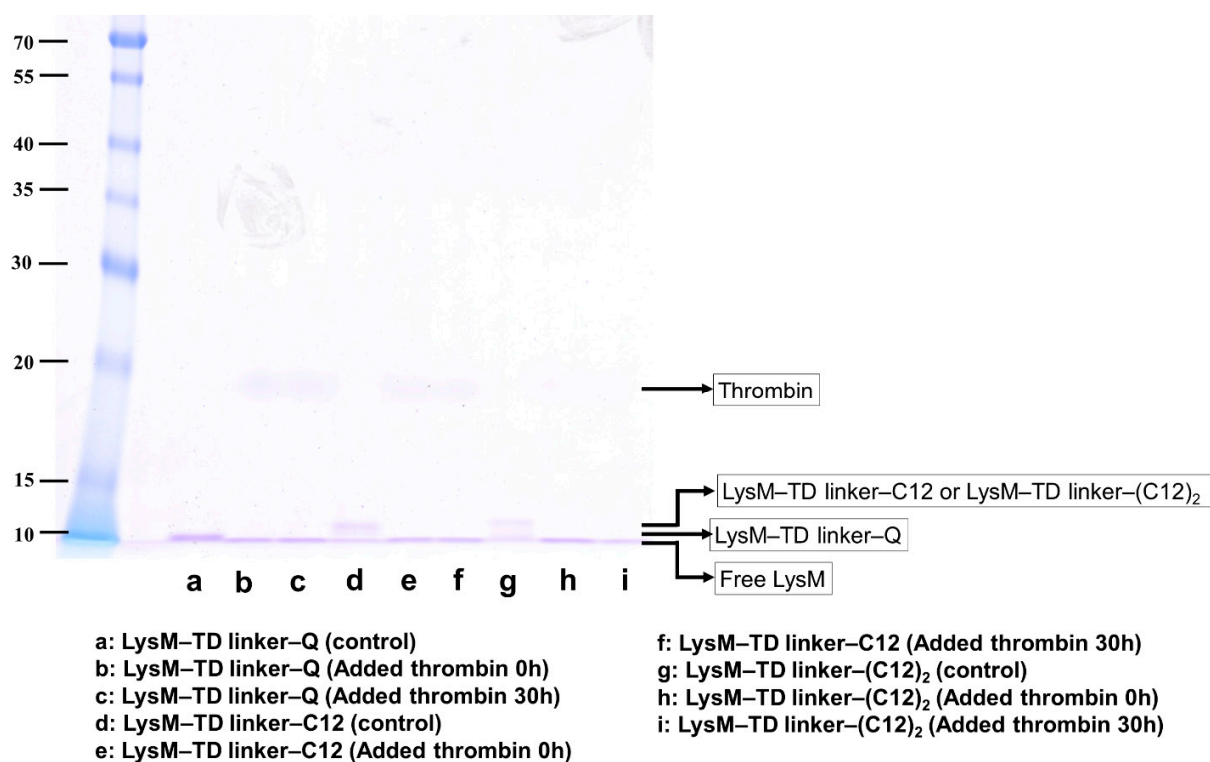

**Figure S9.** SDS-PAGE analysis of thrombin activity assay after different incubation time of LysM–TD linker–Q, LysM–TD linker–C12 and LysM–TD linker–(C12)<sub>2</sub> at 35°C.
